# Supplementary material for: Fe2+ Alleviated the Toxicity of ZnO Nanoparticles to Pseudomonas tolaasii Y-11 by Changing Nanoparticles Behavior in Solution
Source: MDPI journal article supplement (doi:10.3390/microorganisms9112189), 2021-10-20
Supplement: s1 [file s1]

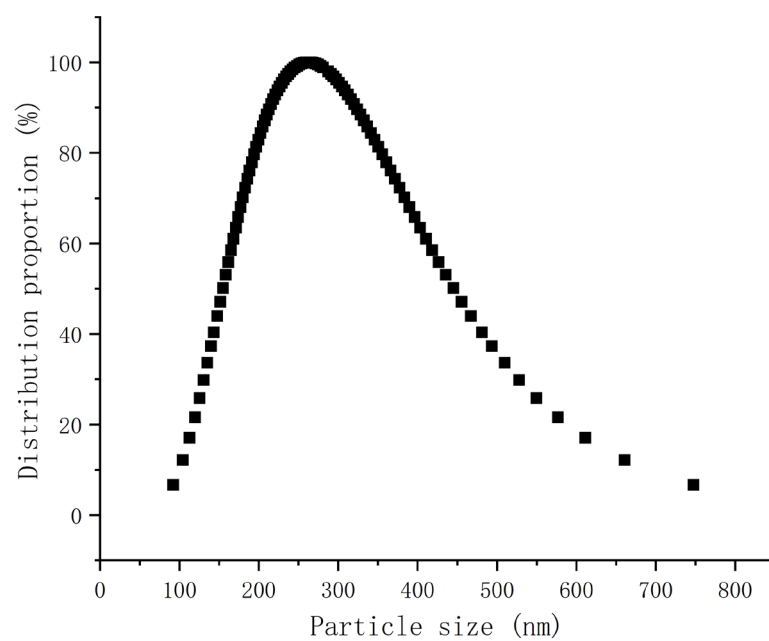

Figure S1. Hydrodynamic diameter of ZnO-NPs (1000 mg/L)

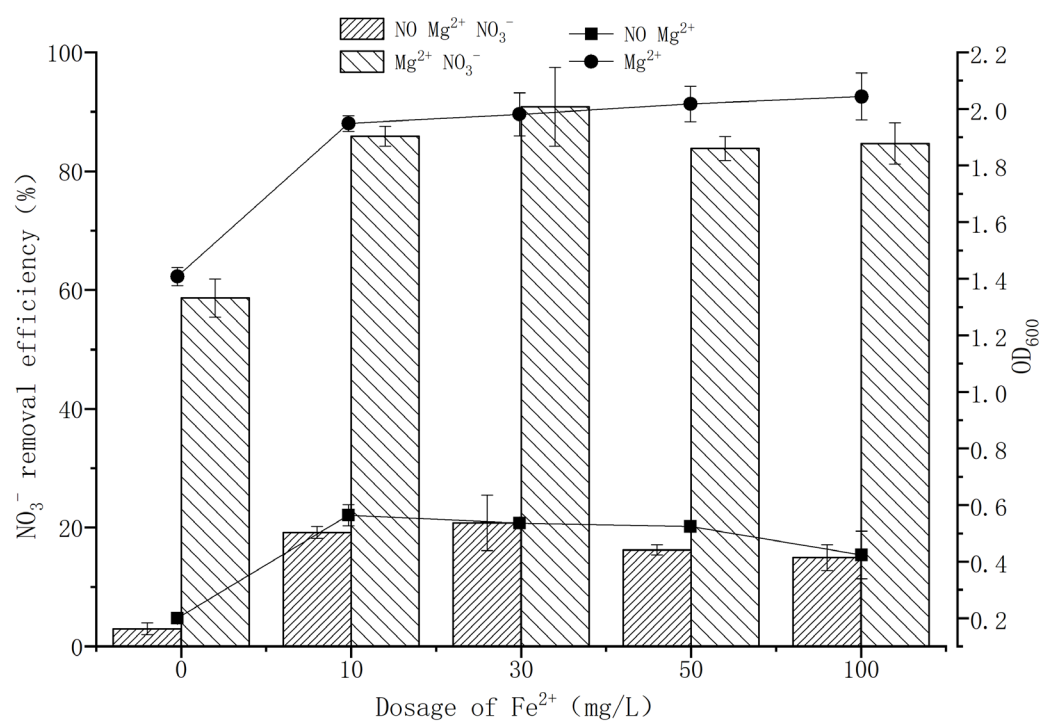

Figure S2. Effect of  $\text{Fe}^{2+}$  on the growth and  $\text{NO}_3^-$  removal of *P. tolaasii* Y-11.

Table S1. Zeta potential of ZnO-NPs with and without Fe<sup>2+</sup>

|                                     | Zeta Potential (mV) |
|-------------------------------------|---------------------|
| Strain Y-11                         | -16.88 ± 1.75       |
| 200 mg/L ZnO-NPs                    | 11.15 ± 1.9         |
| 200 mg/L ZnO-NPs + Fe <sup>2+</sup> | 6.27 ± 1.86         |

The data are expressed as mean ± SE (*n* = 8)
